# Supplementary material
Source: PubMed Central journal article supplement (PMC6649277)
Supplement: ao8b03028_si_001.pdf [file ao8b03028_si_001.pdf]

# Effect of Terminal Modifications on the Adsorption and Assembly of hIAPP(20-29)

*Roozbeh Hajiraissi,<sup>†</sup> Marcel Hanke,<sup>†</sup> Alejandro Gonzalez Orive,<sup>†</sup> Belma Duderija,<sup>†</sup> Ulrike Hofmann,<sup>‡</sup> Yixin Zhang,<sup>‡</sup> Guido Grundmeier,<sup>†</sup> and Adrian Keller\*<sup>†</sup>*

<sup>†</sup> Technical and Macromolecular Chemistry, Paderborn University, Warburger Str. 100, 33098 Paderborn, Germany.

<sup>‡</sup> B CUBE - Center for Molecular Bioengineering, Technische Universität Dresden, Arnoldstr. 18, 01307 Dresden, Germany.

## ThT fluorescence spectra

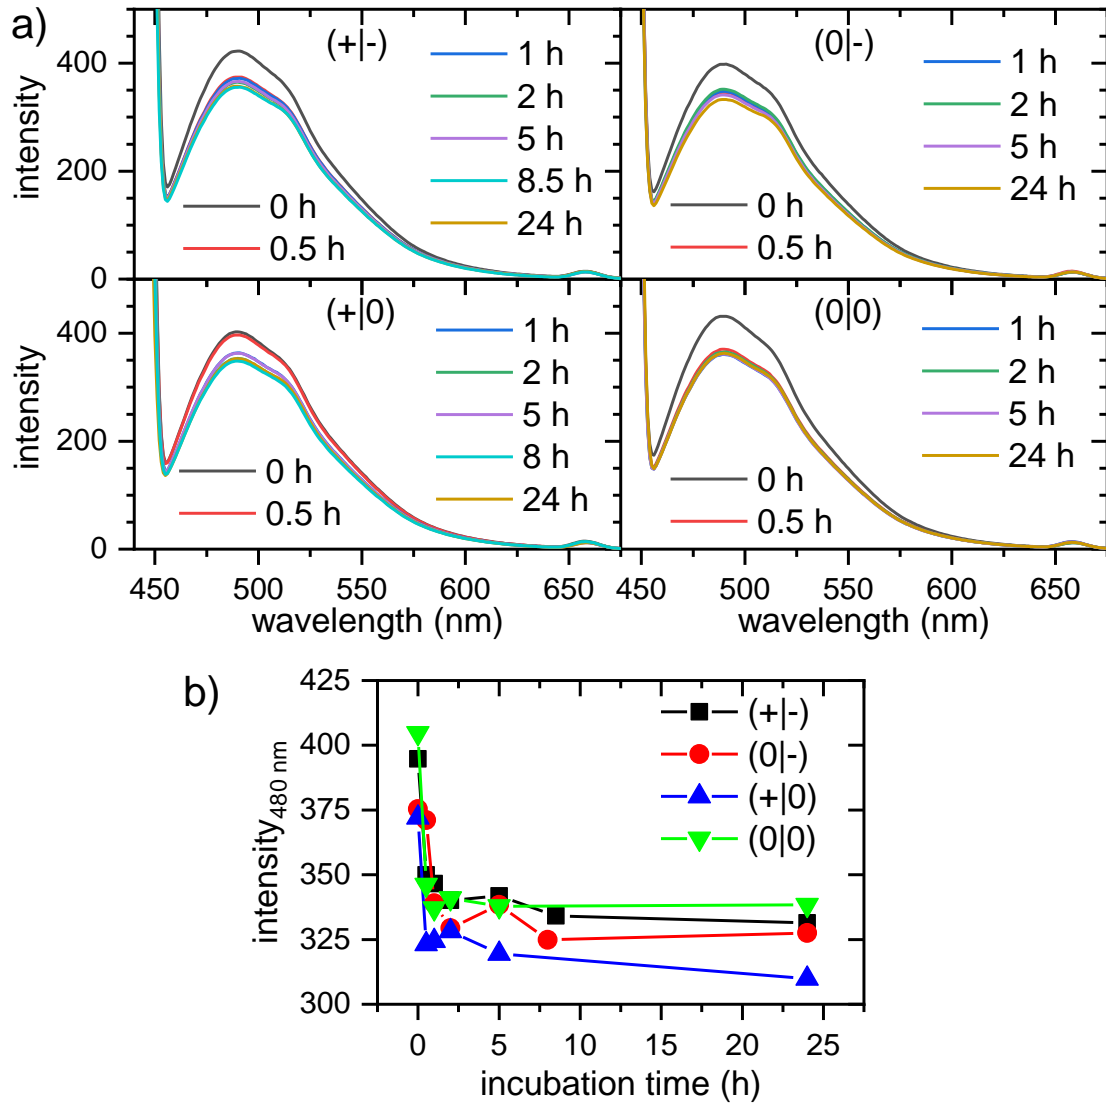

**Figure S1.** a) ThT fluorescence spectra for the different hIAPP(20-29) fragments in bulk solution (PBS, pH 7.5, 37°C,  $\lambda_{ex} = 440$  nm) recorded after different times of incubation. b) Corresponding fluorescence intensities ( $\lambda_{em} = 480$  nm) as a function of incubation time.

**Additional AFM images for assembly in bulk solution**

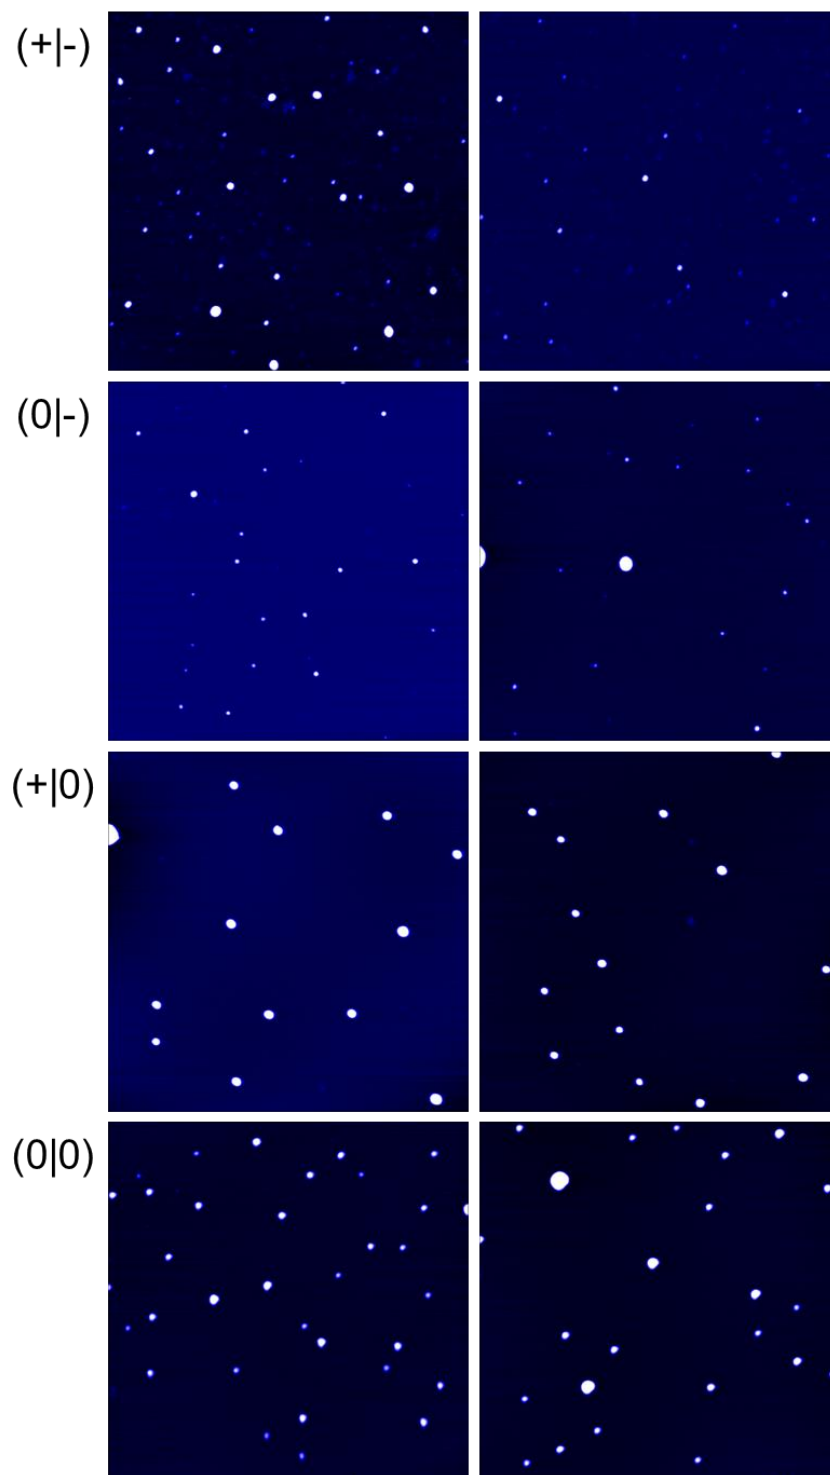

**Figure S2.** Additional AFM images ( $2 \times 2 \mu\text{m}^2$ ) of the assembled hIAPP(20-29) aggregates recorded after 24 h incubation without ThT. The z-scales are 5 nm for all images.

### Different overtones recorded in the QCM-D measurements

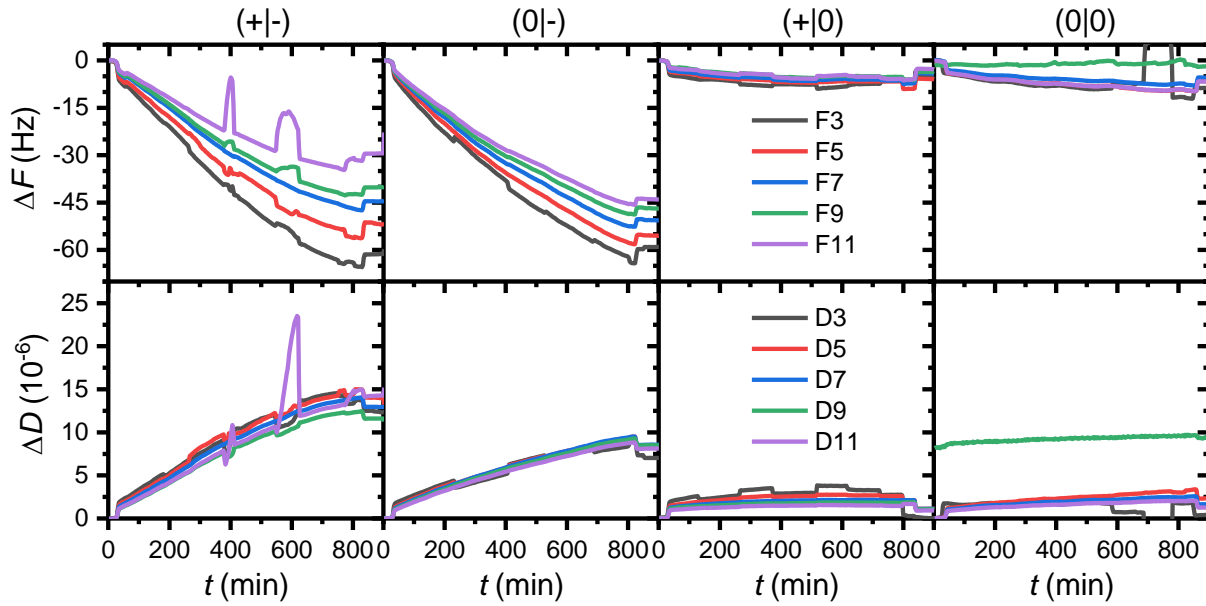

**Figure S3.**  $\Delta F$  and  $\Delta D$  results (overtones 3 to 11) for the adsorption of the different hIAPP(20-29) fragments at the  $\text{NH}_2$ -terminated SAM.

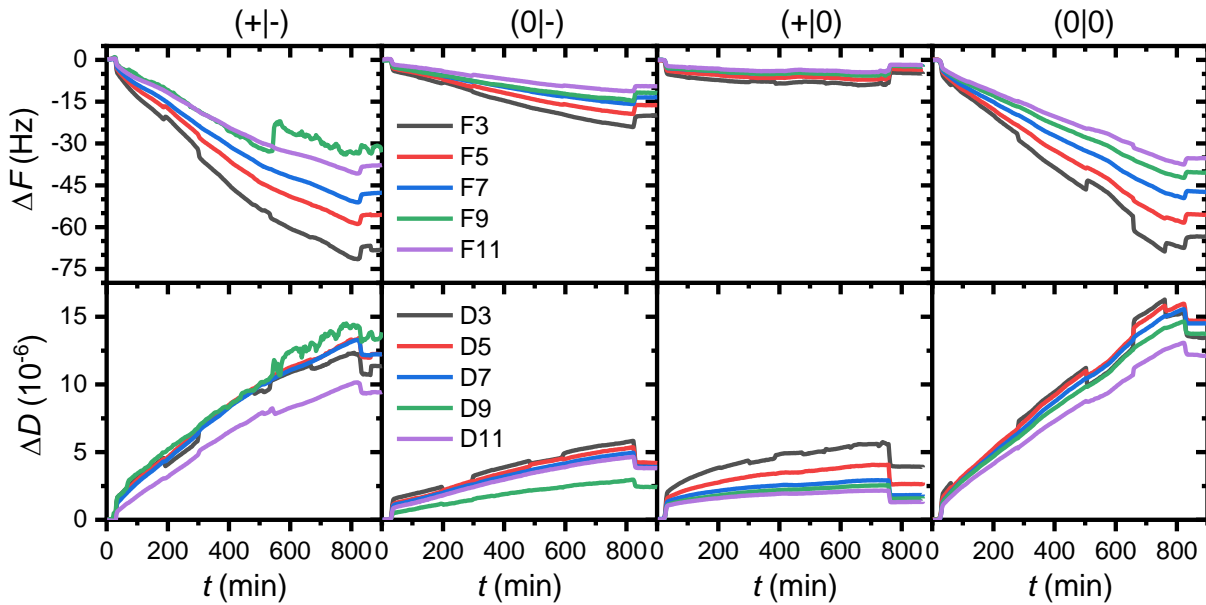

**Figure S4.**  $\Delta F$  and  $\Delta D$  results (overtones 3 to 11) for the adsorption of the different hIAPP(20-29) fragments at the  $\text{COOH}$ -terminated SAM.

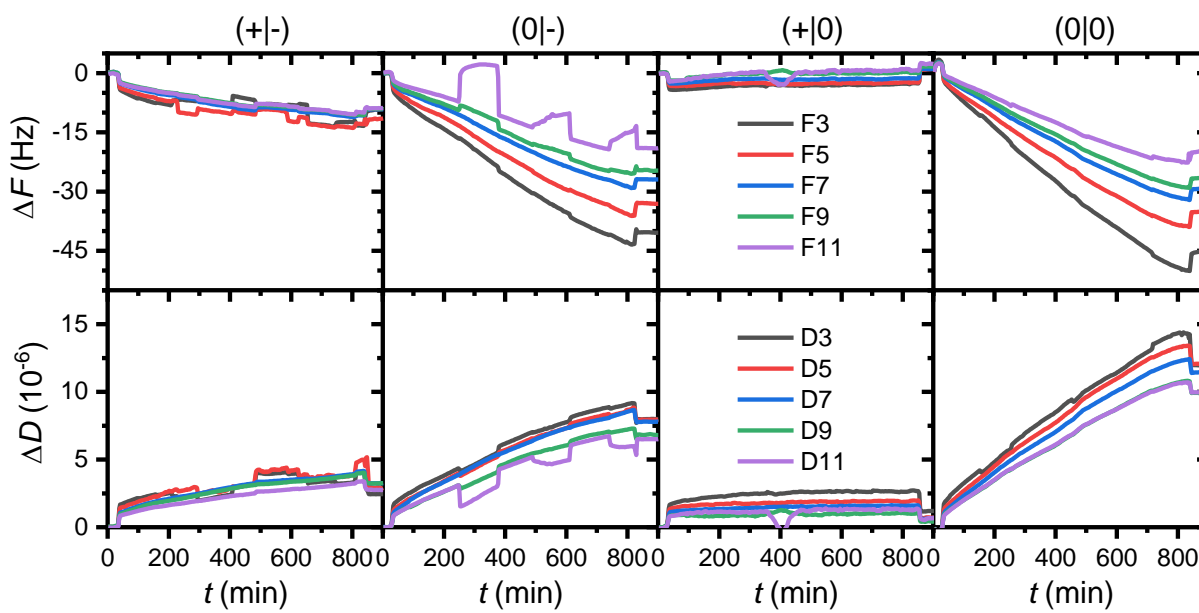

**Figure S5.**  $\Delta F$  and  $\Delta D$  results (overtones 3 to 11) for the adsorption of the different hIAPP(20-29) fragments at the OH-terminated SAM.

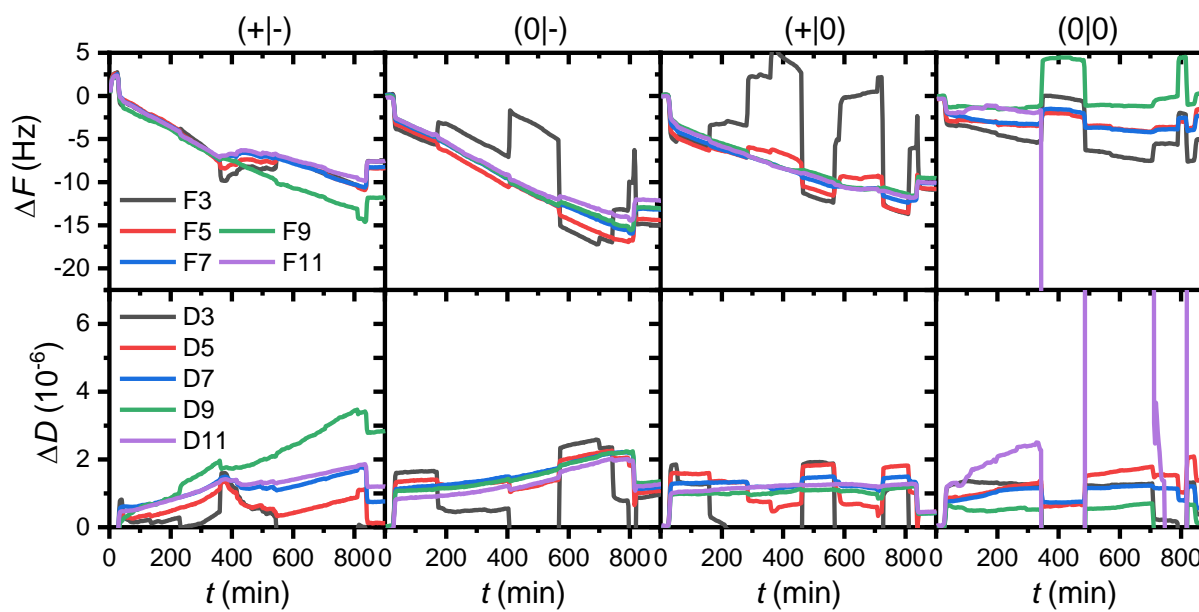

**Figure S6.**  $\Delta F$  and  $\Delta D$  results (overtones 3 to 11) for the adsorption of the different hIAPP(20-29) fragments at the CH<sub>3</sub>-terminated SAM.

**AFM images of the different adsorbate films at NH<sub>2</sub>, COOH, and OH SAMs**

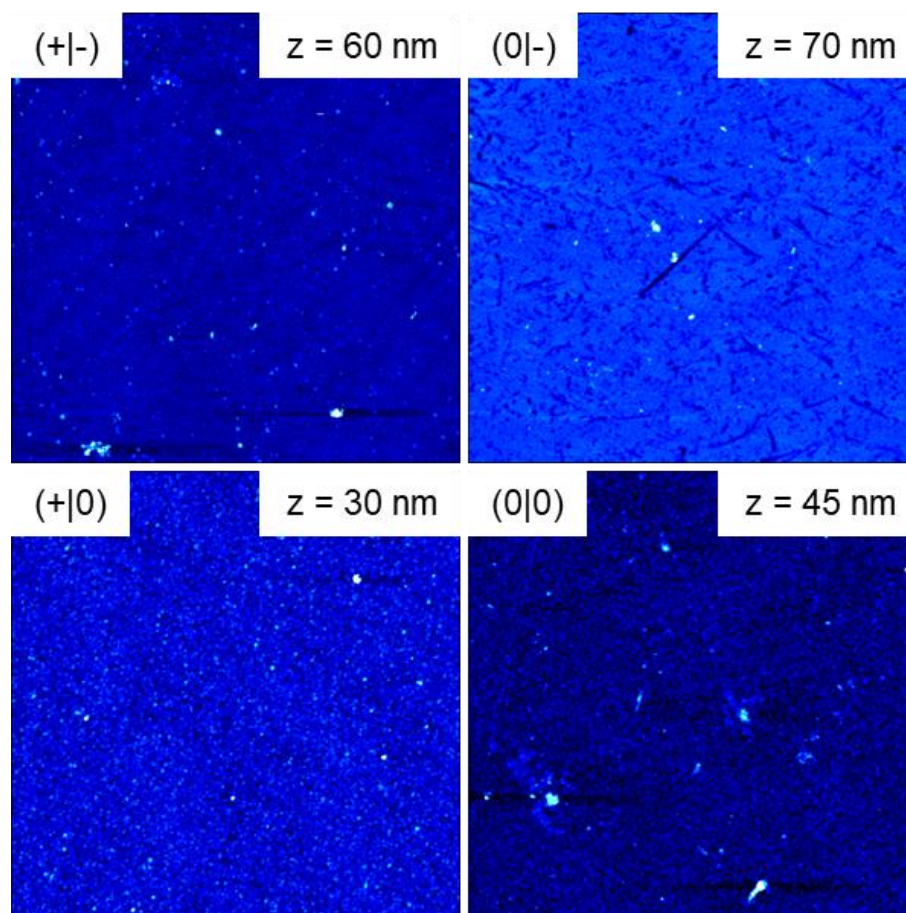

*Figure S7. AFM images ( $10 \times 10 \mu\text{m}^2$ ) of the adsorbed fragments on the NH<sub>2</sub> SAM recorded after the end of the QCM-D measurements. The ranges of the z-scales are given in the images.*

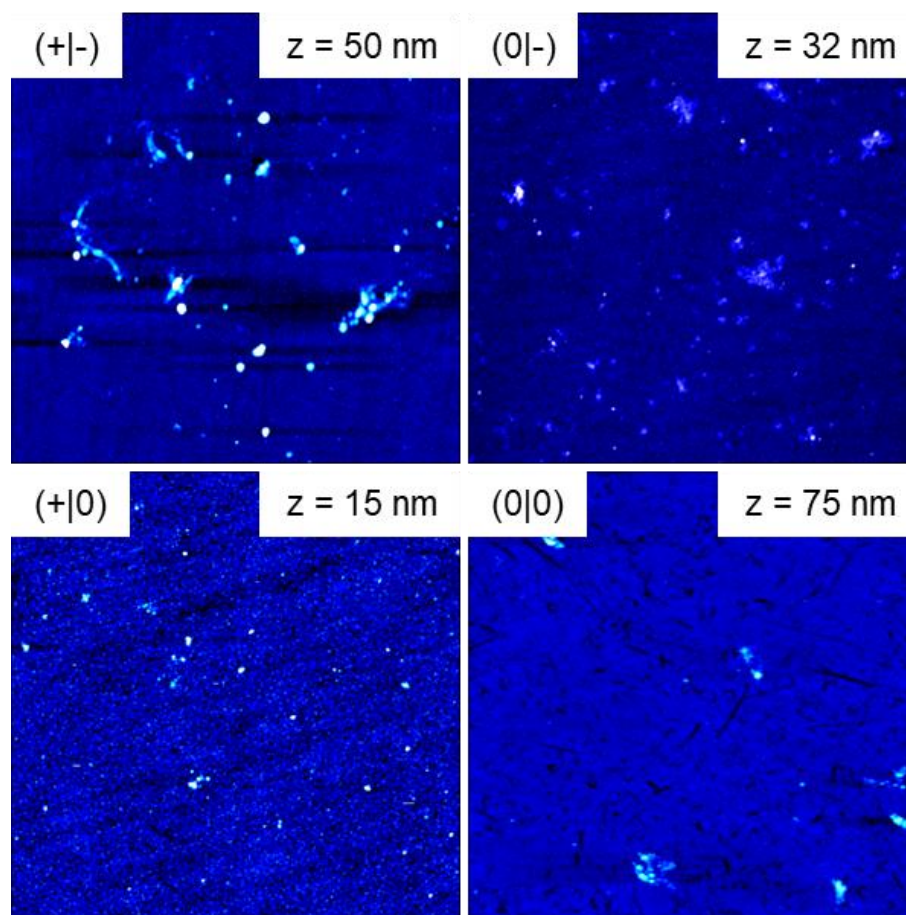

**Figure S8.** AFM images ( $10 \times 10 \mu\text{m}^2$ ) of the adsorbed fragments on the COOH SAM recorded after the end of the QCM-D measurements. The ranges of the z-scales are given in the images.

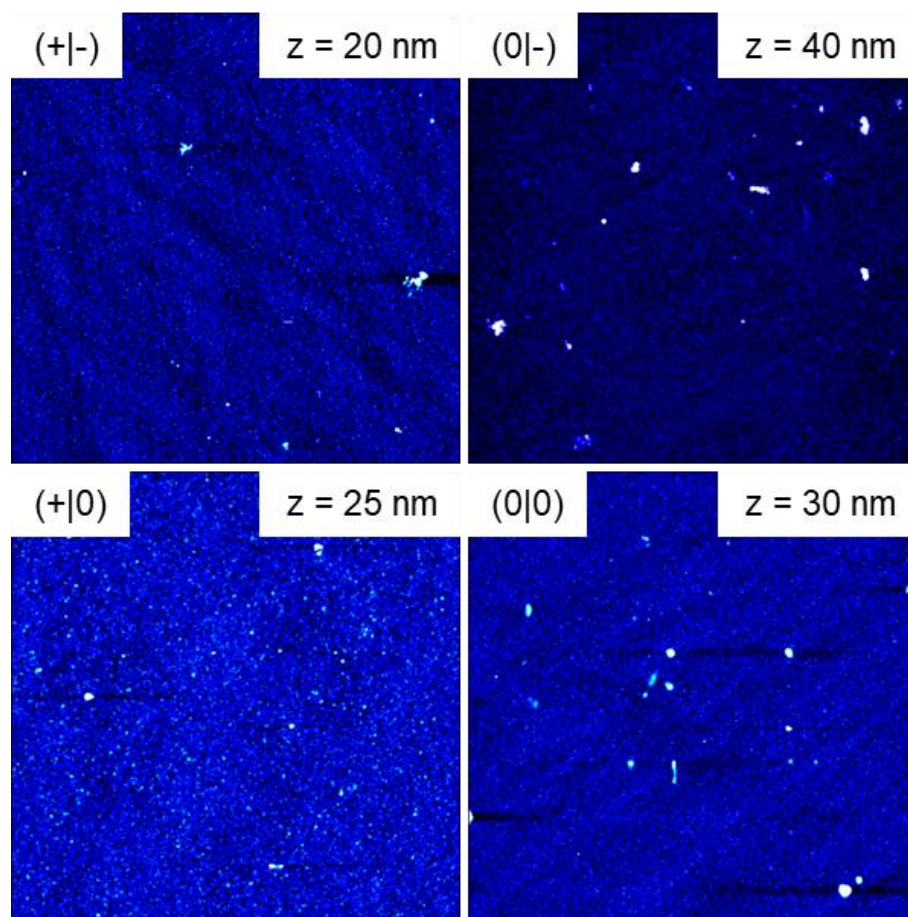

**Figure S9.** AFM images ( $10 \times 10 \mu\text{m}^2$ ) of the adsorbed fragments on the OH SAM recorded after the end of the QCM-D measurements. The ranges of the  $z$ -scales are given in the images.



## Deconvolution of PM-IRRA spectra

The PM-IRRAS technique has been traditionally used for the accurate assessment of the secondary structure exhibited by both polypeptides and proteins from their characteristic amide contributions.<sup>1,2</sup> The amide I peak originates mainly from backbone C=O stretching vibrations and shows frequencies in the range of 1700 – 1600 cm<sup>-1</sup>. The exact band position is determined by the backbone conformation and, consequently, resembles the secondary structure of the protein. The amide II band reflects a combination of backbone N-H bending and C-N stretching and has frequencies between 1580 and 1510 cm<sup>-1</sup>. We might also associate the position of the latter with the secondary structure of the protein, but the analysis would necessarily be more complex.<sup>3</sup> These amide signatures, *i.e.*, the amide I band centered at 1655 cm<sup>-1</sup> and amide II at 1550 cm<sup>-1</sup>,<sup>4</sup> appear slightly overlapped in some PM-IRRA spectra. A certain degree of overlapping between amide I and amide II bands has previously been reported for the amyloidogenic Josephin domains of ataxin-3 assembled into oligomers and fibrils.<sup>5</sup> In general, the amide I band (after subtraction of the amide II contribution) is essentially centered at 1620 – 1630 cm<sup>-1</sup>, characteristic of parallel  $\beta$ -sheet conformations, accompanied by a small peak at 1670 cm<sup>-1</sup> corresponding to  $\beta$ -turns. In some occasions, a smaller component at 1690 cm<sup>-1</sup> can be detected as well, which we attribute to antiparallel  $\beta$ -sheets.<sup>6</sup>

The amide I signature exhibited by the different hIAPP(20-29) fragments shows common features which are discussed in detail in the following. Three main moieties in the range of 1610 – 1635 cm<sup>-1</sup> have been observed, absorbing at approximately 1610 – 1615, 1620 – 1625, and 1634 cm<sup>-1</sup>, all of them corresponding to vibrational motions of the backbone amide moieties in parallel  $\beta$ -sheet conformations, thus suggesting that monomers in the aggregates could be arranged into different secondary structural architectures and/or aggregation states. The latter would comprise of

oligomers (from dimers to multimers), protofibrils, and mature fibrils of different morphology. In this regard, it has been shown that the intermediate frequency  $\beta$ -sheet component, *i.e.*, at 1620 – 1625  $\text{cm}^{-1}$ , can be attributed to an extended multi-stranded intermolecular hydrogen-bonded  $\beta$ -sheet configuration (cross- $\beta$  architecture found in amyloid-like fibrils).<sup>3,7,8</sup> Additionally, the  $\beta$ -sheet component at higher frequencies, 1634  $\text{cm}^{-1}$ , would correspond to shorter and more disordered fibril units, if present.<sup>9</sup> More recently, it has been shown for A $\beta_{1-40}$  and A $\beta_{1-42}$  polypeptides that contributions in the  $\beta$ -sheet range close to 1610  $\text{cm}^{-1}$  can be attributed to the occurrence of very stable amyloid fibrils. This finding would open the door to an efficient FTIR-based distinction between amyloid fibrils and  $\beta$ -sheet-rich aggregated oligomers and protofibrils, which more likely appear at 1625  $\text{cm}^{-1}$ .<sup>10</sup> Nevertheless, this contribution at 1610  $\text{cm}^{-1}$  is not easy to be deconvoluted from the broader and more intense 1625  $\text{cm}^{-1}$  peak. The enrichment in the parallel  $\beta$ -sheet content has been traditionally correlated to the aggregated nature of the sample and in particular the formation of amyloid fibrils, whilst an increase in the antiparallel  $\beta$ -sheet has been mostly attributed to the aggregation of oligomers. In this regard, Cerf *et al.* used ATR to unambiguously demonstrate that although both A $\beta$  fibrils and oligomers exhibit a predominant  $\beta$ -sheet structural conformation, only the oligomers show antiparallel  $\beta$ -sheet conformations.<sup>6</sup> In this regard, it has been stated that these A $\beta$  oligomers were composed of  $\beta$ -strands mostly in an antiparallel organization.<sup>7</sup> This behaviour has also been reported for a significant number of other proteins, polypeptides, and fragments, as reviewed by Sarroukh *et al.*<sup>3</sup> On the other hand, more recently, using nano-IR, Ruggeri *et al.* identified a significant increase in the antiparallel  $\beta$ -sheet contribution for the adsorption of Josephin domains of ataxin-3 (1-182) onto APTES-modified mica substrates (positively charged), when comparing native oligomers to misfolded oligomers, which turned out to be even higher for amyloid fibrils.<sup>5</sup>

The detailed deconvolution of the PM-IRRA spectra and the resulting secondary structure contents of the different hIAPP(20-29) fragments assembled in bulk solution and at the different SAM-modified gold surfaces are given in figures S10 – S14 and tables S1 – S5.

**Bulk solution**

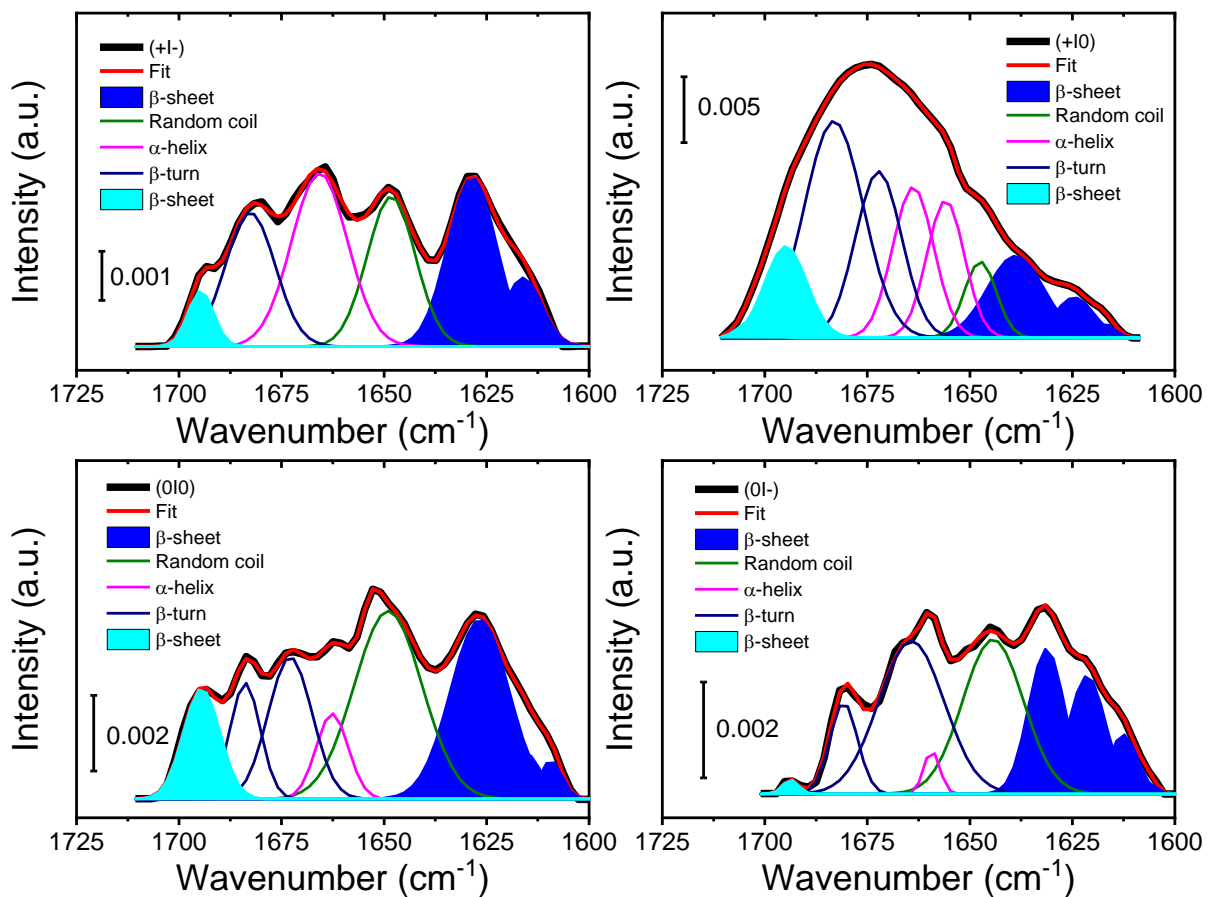

**Figure S10.** Deconvolution of the PM-IRRA spectra in the amide I region recorded for the different hIAPP(20-29) fragments assembled in bulk solution: native (upper left panel), amidated (upper right panel), acetylated and amidated (lower left panel) and acetylated (lower right panel), respectively. Black lines correspond to the experimental data while red lines represent the sums of the fitted components.

**Table S1.** Secondary structure contents obtained for the deconvolution of the PM-IRRA spectra registered for the different hIAPP(20-29) fragments assembled in bulk solution.

| <b>Native (+ -)</b>                  |                                   |                       |                  |                     |
|--------------------------------------|-----------------------------------|-----------------------|------------------|---------------------|
| <b>Component</b>                     | <b>Position (cm<sup>-1</sup>)</b> | <b>Percentage (%)</b> | <b>total (%)</b> | <b>Amide I area</b> |
| β-sheet                              | 1616                              | 7.11                  | 29.94            | 0.23105             |
| β-sheet                              | 1629                              | 22.83                 |                  |                     |
| Random coil                          | 1648                              | 20.5                  | 20.5             |                     |
| α-helix                              | 1665                              | 27.03                 | 27.03            |                     |
| β-turn                               | 1682                              | 18.57                 | 18.57            |                     |
| β-sheet                              | 1695                              | 3.95                  | 3.95             |                     |
| <b>Amidated (+ 0)</b>                |                                   |                       |                  |                     |
| <b>Component</b>                     | <b>Position (cm<sup>-1</sup>)</b> | <b>Percentage (%)</b> | <b>total (%)</b> | <b>Amide I area</b> |
| β-sheet                              | 1617                              | 0.62                  | 14.31            | 1.06218             |
| β-sheet                              | 1625                              | 3.47                  |                  |                     |
| β-sheet                              | 1637                              | 10.22                 |                  |                     |
| Random coil                          | 1647                              | 5.40                  | 5.40             |                     |
| α-helix                              | 1656                              | 11.63                 | 25.30            |                     |
| α-helix                              | 1663                              | 13.67                 |                  |                     |
| β-turn                               | 1672                              | 17.03                 | 45.35            |                     |
| β-turn                               | 1682                              | 28.31                 |                  |                     |
| β-sheet                              | 1695                              | 9.64                  | 9.64             |                     |
| <b>Acetylated and amidated (0 0)</b> |                                   |                       |                  |                     |
| <b>Component</b>                     | <b>Position (cm<sup>-1</sup>)</b> | <b>Percentage (%)</b> | <b>total (%)</b> | <b>Amide I area</b> |
| β-sheet                              | 1610                              | 1.98                  | 29.55            | 0.34539             |
| β-sheet                              | 1615                              | 2.92                  |                  |                     |
| β-sheet                              | 1627                              | 24.64                 |                  |                     |
| Random coil                          | 1649                              | 29.98                 | 29.98            |                     |
| α-helix                              | 1662                              | 8.08                  | 8.08             |                     |
| β-turn                               | 1673                              | 14.64                 | 22.93            |                     |
| β-turn                               | 1684                              | 8.29                  |                  |                     |
| β-sheet                              | 1694                              | 9.46                  | 9.46             |                     |
| <b>Acetylated (0 -)</b>              |                                   |                       |                  |                     |
| <b>Component</b>                     | <b>Position (cm<sup>-1</sup>)</b> | <b>Percentage (%)</b> | <b>total (%)</b> | <b>Amide I area</b> |
| β-sheet                              | 1614                              | 4.82                  | 32.26            | 0.22231             |
| β-sheet                              | 1621                              | 12.47                 |                  |                     |
| β-sheet                              | 1631                              | 14.96                 |                  |                     |
| Random coil                          | 1644                              | 27.01                 | 27.01            |                     |
| α-helix                              | 1658                              | 3.46                  | 3.46             |                     |
| β-turn                               | 1667                              | 28.88                 | 36.18            |                     |
| β-turn                               | 1680                              | 7.30                  |                  |                     |
| β-sheet                              | 1694                              | 1.09                  | 1.09             |                     |

**Positively charged  $\text{NH}_2$ -terminated SAM**

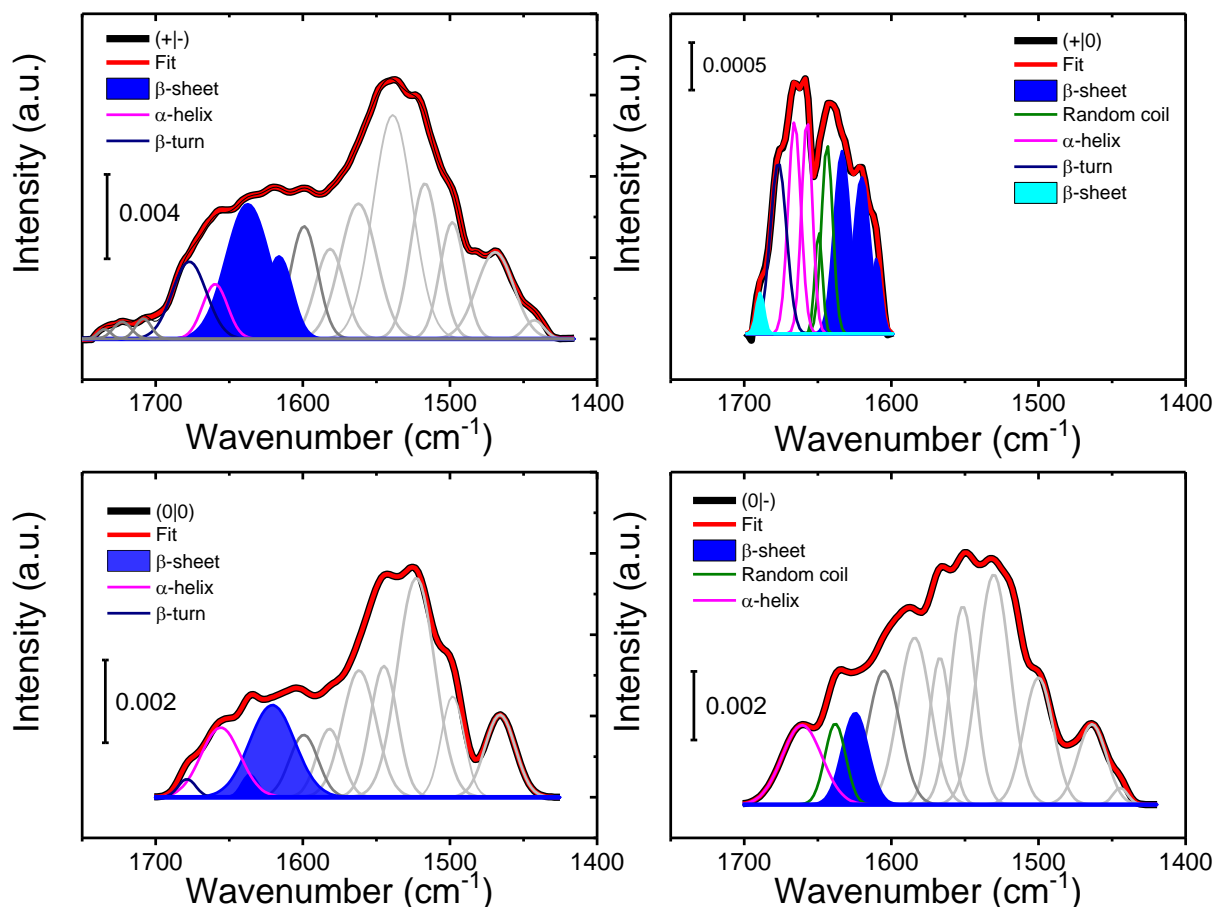

**Figure S11.** Deconvolution of the PM-IRRA spectra in the amide I region recorded for the different hIAPP(20-29) fragments assembled at the  $\text{NH}_2$ -terminated SAM: native (upper left panel), amidated (upper right panel), acetylated and amidated (lower left panel) and acetylated (lower right panel), respectively. Black lines correspond to the experimental data while red lines represent the sums of the fitted components.

**Table S2.** Secondary structure contents obtained for the deconvolution of the PM-IRRA spectra registered for the different hIAPP(20-29) fragments assembled at the NH<sub>2</sub>-terminated SAM.

| <b>Native (+ -)</b>                  |                                   |                       |                  |                     |
|--------------------------------------|-----------------------------------|-----------------------|------------------|---------------------|
| <b>Component</b>                     | <b>Position (cm<sup>-1</sup>)</b> | <b>Percentage (%)</b> | <b>total (%)</b> | <b>Amide I area</b> |
| β-sheet                              | 1616                              | 18.86                 | 66.93            | 0.51002             |
| β-sheet                              | 1635                              | 48.07                 |                  |                     |
| α-helix                              | 1660                              | 11.27                 | 11.27            |                     |
| β-turn                               | 1678                              | 21.80                 | 21.80            |                     |
| <b>Amidated (+ 0)</b>                |                                   |                       |                  |                     |
| <b>Component</b>                     | <b>Position (cm<sup>-1</sup>)</b> | <b>Percentage (%)</b> | <b>total (%)</b> | <b>Amide I area</b> |
| β-sheet                              | 1611                              | 4.18                  | 35.81            | 0.16024             |
| β-sheet                              | 1620                              | 14.80                 |                  |                     |
| β-sheet/ R. coil                     | 1633                              | 16.83                 |                  |                     |
| Random coil                          | 1644                              | 12.36                 | 16.85            |                     |
| Random coil                          | 1650                              | 4.49                  |                  |                     |
| α-helix                              | 1658                              | 13.57                 | 29.24            |                     |
| α-helix                              | 1665                              | 15.67                 |                  |                     |
| β-turn                               | 1677                              | 16.21                 | 16.21            |                     |
| β-sheet                              | 1690                              | 1.89                  | 1.89             |                     |
| <b>Acetylated and amidated (0 0)</b> |                                   |                       |                  |                     |
| <b>Component</b>                     | <b>Position (cm<sup>-1</sup>)</b> | <b>Percentage (%)</b> | <b>total (%)</b> | <b>Amide I area</b> |
| β-sheet                              | 1620                              | 55.02                 | 59.66            | 0.15864             |
| β-sheet                              | 1635                              | 4.64                  |                  |                     |
| Random coil                          | -                                 | 0                     | 0                |                     |
| α-helix                              | 1655                              | 36.08                 | 36.08            |                     |
| β-turn                               | 1678                              | 4.26                  | 4.26             |                     |
| <b>Acetylated (0 -)</b>              |                                   |                       |                  |                     |
| <b>Component</b>                     | <b>Position (cm<sup>-1</sup>)</b> | <b>Percentage (%)</b> | <b>total (%)</b> | <b>Amide I area</b> |
| β-sheet                              | 1624                              | 32.84                 | 32.84            | 0.18507             |
| Random coil                          | 1640                              | 23.28                 | 23.28            |                     |
| α-helix/ β-turn                      | 1660                              | 43.88                 | 43.88            |                     |
| β-turn                               | -                                 | 0                     | 0                |                     |

### Negatively charged COOH-terminated SAM

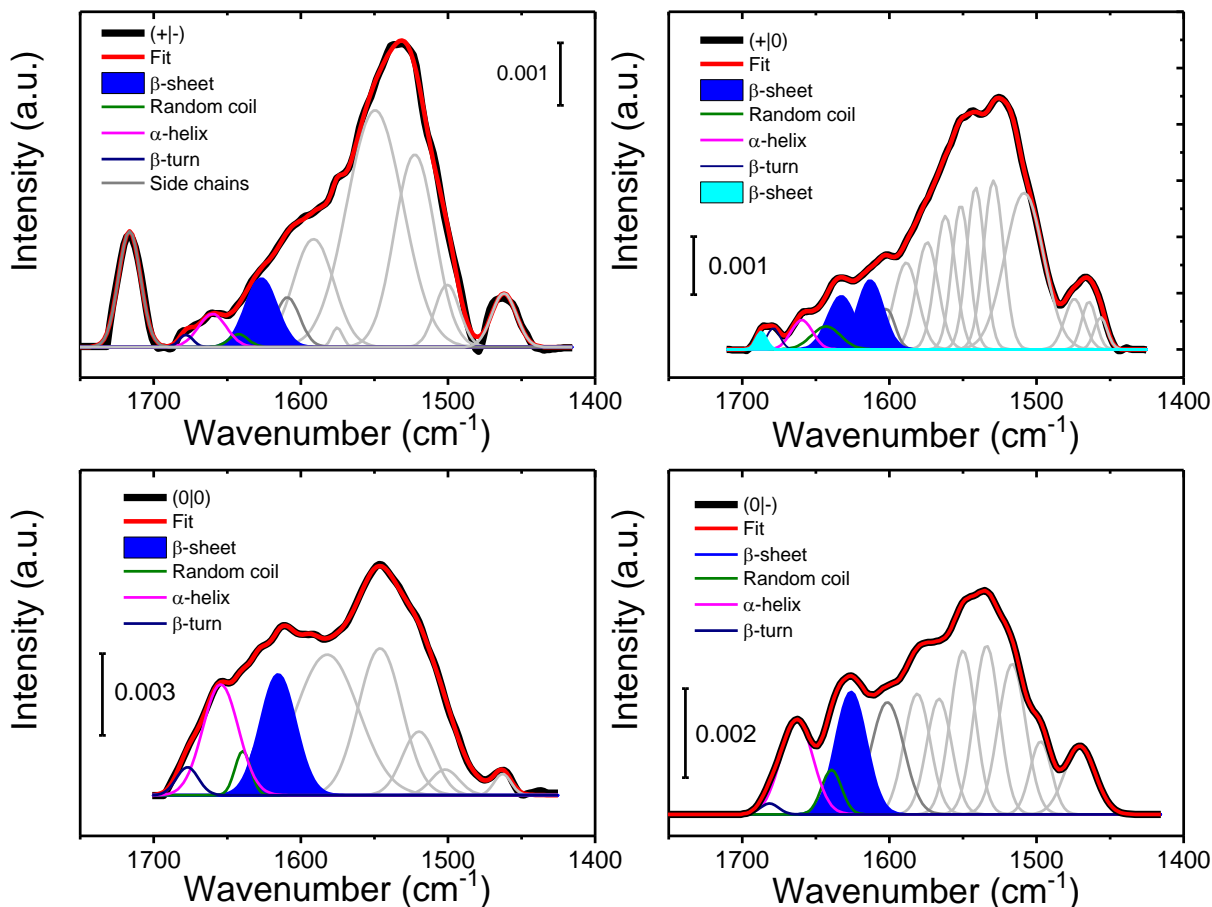

**Figure S12.** Deconvolution of the PM-IRRRA spectra in the amide I region recorded for the different hIAPP(20-29) fragments assembled at the COOH-terminated SAM: native (upper left panel), amidated (upper right panel), acetylated and amidated (lower left panel) and acetylated (lower right panel), respectively. Black lines correspond to the experimental data while red lines represent the sums of the fitted components.



**Table S3.** Secondary structure contents obtained for the deconvolution of the PM-IRRA spectra registered for the different hIAPP(20-29) fragments assembled at the COOH-terminated SAM.

| <b>Native (+ -)</b>                  |                                   |                       |                  |                     |
|--------------------------------------|-----------------------------------|-----------------------|------------------|---------------------|
| <b>Component</b>                     | <b>Position (cm<sup>-1</sup>)</b> | <b>Percentage (%)</b> | <b>total (%)</b> | <b>Amide I area</b> |
| β-sheet                              | 1627                              | 61.45                 | 61.45            | 0.04884             |
| Random coil                          | 1642                              | 7.14                  | 7.14             |                     |
| α-helix                              | 1660                              | 26.60                 | 26.60            |                     |
| β-turn                               | 1678                              | 4.80                  | 4.80             |                     |
| <b>Amidated (+ 0)</b>                |                                   |                       |                  |                     |
| <b>Component</b>                     | <b>Position (cm<sup>-1</sup>)</b> | <b>Percentage (%)</b> | <b>total (%)</b> | <b>Amide I area</b> |
| β-sheet                              | 1613                              | 35.70                 | 64.52            | 0.0754              |
| β-sheet                              | 1632                              | 28.82                 |                  |                     |
| Random coil                          | 1644                              | 13.48                 | 13.48            |                     |
| α-helix                              | 1660                              | 12.64                 | 12.64            |                     |
| β-turn                               | 1679                              | 5.68                  | 5.68             |                     |
| β-sheet                              | 1688                              | 3.68                  | 3.68             |                     |
| <b>Acetylated and amidated (0 0)</b> |                                   |                       |                  |                     |
| <b>Component</b>                     | <b>Position (cm<sup>-1</sup>)</b> | <b>Percentage (%)</b> | <b>total (%)</b> | <b>Amide I area</b> |
| β-sheet                              | 1615                              | 41.17                 | 49.21            | 0.32557             |
| β-sheet                              | 1629                              | 8.08                  |                  |                     |
| Random coil                          | 1640                              | 6.73                  | 11.4             |                     |
| α-helix                              | 1655                              | 38.07                 | 64.7             |                     |
| β-turn                               | 1677                              | 5.94                  | 10.1             |                     |
| <b>Acetylated (0 -)</b>              |                                   |                       |                  |                     |
| <b>Component</b>                     | <b>Position (cm<sup>-1</sup>)</b> | <b>Percentage (%)</b> | <b>total (%)</b> | <b>Amide I area</b> |
| β-sheet                              | 1622                              | 47.56                 | 47.56            | 0.15602             |
| Random coil                          | 1645                              | 11.28                 | 11.28            |                     |
| α-helix                              | 1662                              | 38.63                 | 38.63            |                     |
| β-turn                               | 1682                              | 2.53                  | 2.53             |                     |

*Polar OH-terminated SAM*

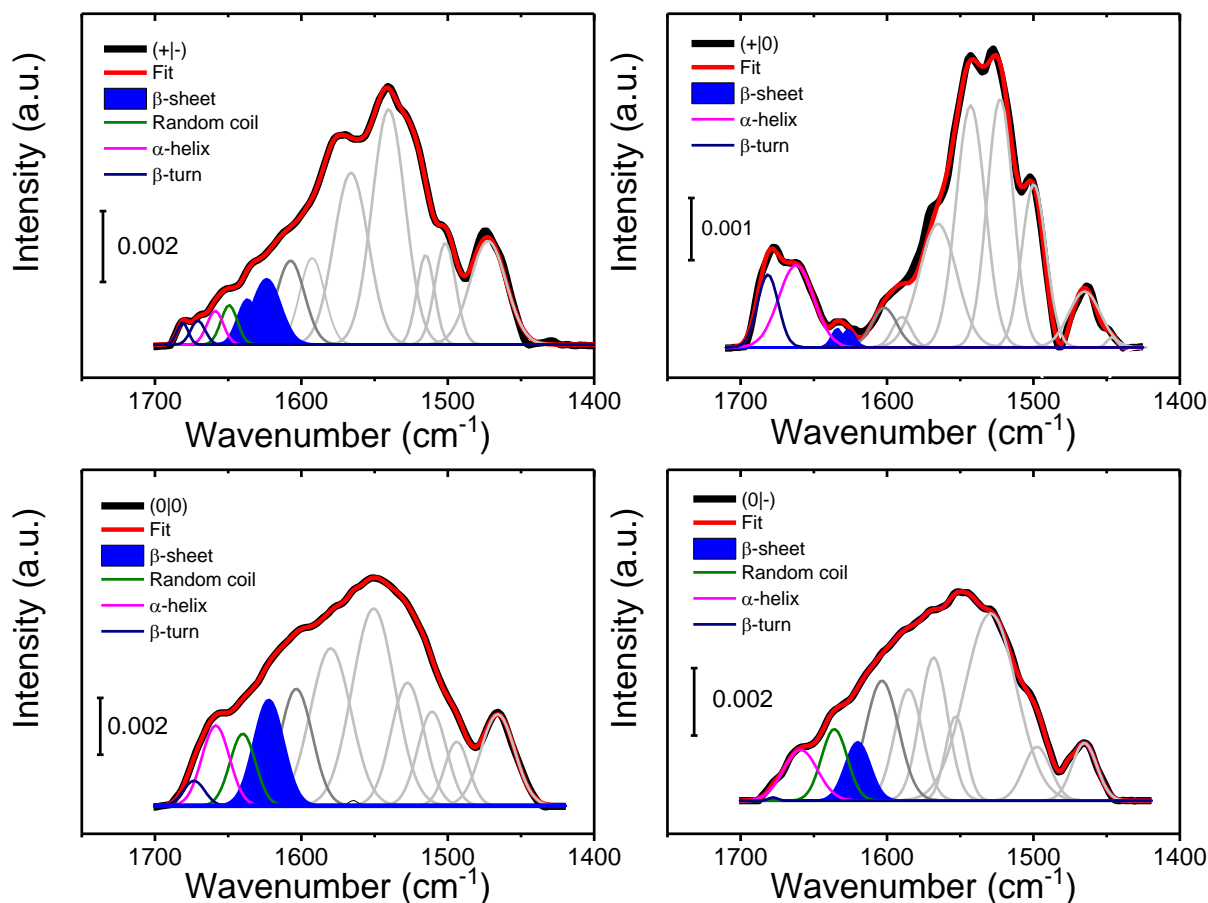

**Figure S13.** Deconvolution of the PM-IRRRA spectra in the amide I region recorded for the different hIAPP(20-29) fragments assembled at the OH-terminated SAM: native (upper left panel), amidated (upper right panel), acetylated and amidated (lower left panel) and acetylated (lower right panel), respectively. Black lines correspond to the experimental data while red lines represent the sums of the fitted components.

**Table S4.** Secondary structure contents obtained for the deconvolution of the PM-IRRA spectra registered for the different hIAPP(20-29) fragments assembled at the OH-terminated SAM.

| <b>Native (+ -)</b>                  |                                   |                       |                  |                     |
|--------------------------------------|-----------------------------------|-----------------------|------------------|---------------------|
| <b>Component</b>                     | <b>Position (cm<sup>-1</sup>)</b> | <b>Percentage (%)</b> | <b>total (%)</b> | <b>Amide I area</b> |
| β-sheet                              | 1624                              | 28.47                 | 48.10            | 0.00694             |
| β-sheet                              | 1636                              | 19.63                 |                  |                     |
| Random coil                          | 1650                              | 17.15                 | 20.97            |                     |
| α-helix                              | 1660                              | 14.65                 | 19.65            |                     |
| β-turn                               | 1670                              | 10.43                 | 20.04            |                     |
| β-turn                               | 1681                              | 9.61                  |                  |                     |
| <b>Amidated (+ 0)</b>                |                                   |                       |                  |                     |
| <b>Component</b>                     | <b>Position (cm<sup>-1</sup>)</b> | <b>Percentage (%)</b> | <b>total (%)</b> | <b>Amide I area</b> |
| β-sheet                              | 1625                              | 4.43                  | 8.65             | 0.08147             |
| β-sheet                              | 1635                              | 4.22                  |                  |                     |
| α-helix                              | 1662                              | 59.77                 | 59.77            |                     |
| β-turn                               | 1681                              | 31.57                 | 31.57            |                     |
| <b>Acetylated and amidated (0 0)</b> |                                   |                       |                  |                     |
| <b>Component</b>                     | <b>Position (cm<sup>-1</sup>)</b> | <b>Percentage (%)</b> | <b>total (%)</b> | <b>Amide I area</b> |
| β-sheet                              | 1622                              | 40.77                 | 40.77            | 0.23606             |
| Random coil                          | 1640                              | 23.80                 | 23.80            |                     |
| α-helix                              | 1657                              | 28.57                 | 28.57            |                     |
| β-turn                               | 1675                              | 6.86                  | 6.86             |                     |
| <b>Acetylated (0 -)</b>              |                                   |                       |                  |                     |
| <b>Component</b>                     | <b>Position (cm<sup>-1</sup>)</b> | <b>Percentage (%)</b> | <b>total (%)</b> | <b>Amide I area</b> |
| β-sheet                              | 1620                              | 28.74                 | 65.09            | 0.13093             |
| β-sheet                              | 1635                              | 36.35                 |                  |                     |
| α-helix/ R.coil                      | 1658                              | 34.31                 | 34.31            |                     |
| β-turn                               | 1678                              | 0.59                  | 0.59             |                     |

## Hydrophobic CH<sub>3</sub>-terminated SAM

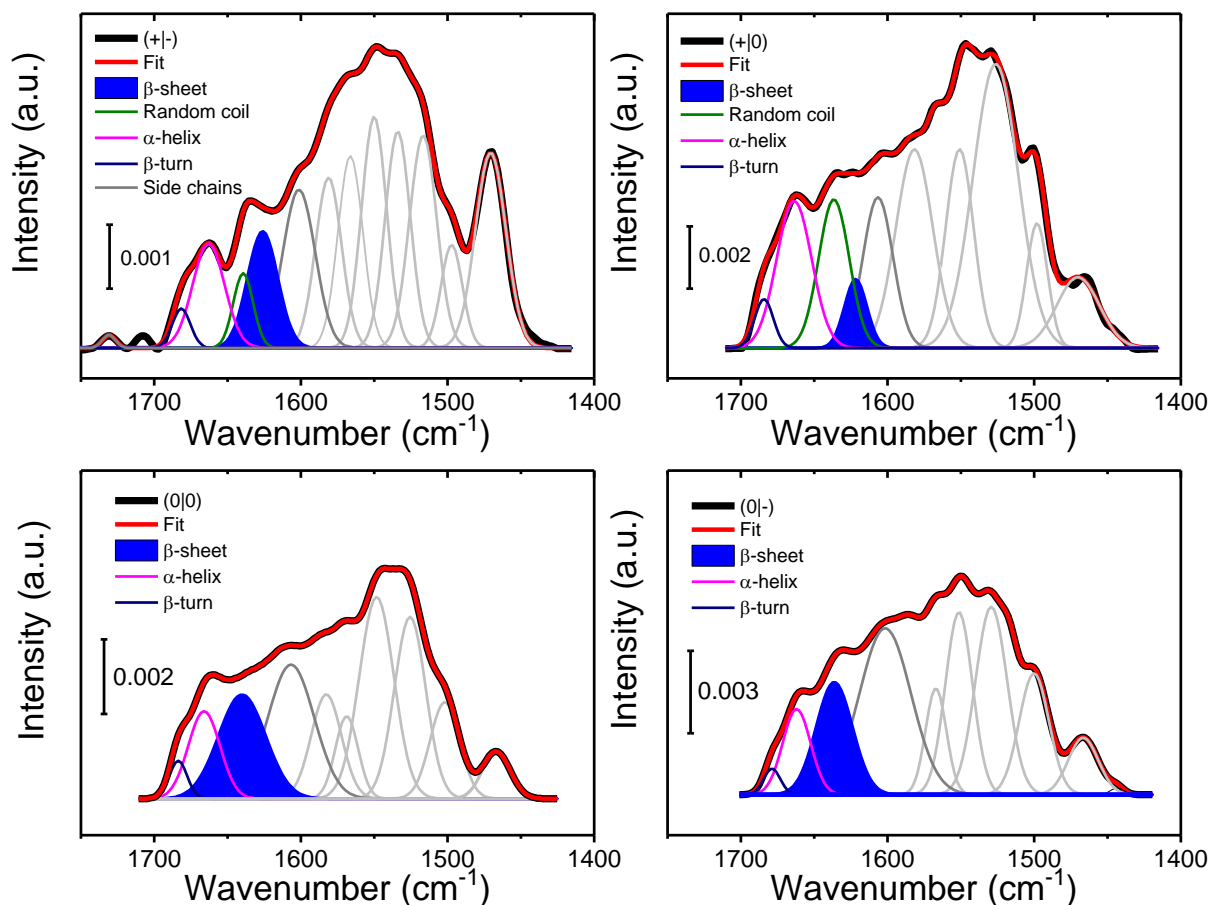

**Figure S14.** Deconvolution of the PM-IRRRA spectra in the amide I region recorded for the different hIAPP(20-29) fragments assembled at the CH<sub>3</sub>-terminated SAM: native (upper left panel), amidated (upper right panel), acetylated and amidated (lower left panel) and acetylated (lower right panel), respectively. Black lines correspond to the experimental data while red lines represent the sums of the fitted components.

**Table S5.** Secondary structure contents obtained for the deconvolution of the PM-IRRA spectra registered for the different hIAPP(20-29) fragments assembled at the CH<sub>3</sub>-terminated SAM.

| <b>Native (+ -)</b>                  |                                   |                       |                  |                     |
|--------------------------------------|-----------------------------------|-----------------------|------------------|---------------------|
| <b>Component</b>                     | <b>Position (cm<sup>-1</sup>)</b> | <b>Percentage (%)</b> | <b>total (%)</b> | <b>Amide I area</b> |
| β-sheet                              | 1626                              | 39.14                 | 39.14            | 0.12799             |
| Random coil                          | 1640                              | 16.29                 | 16.29            |                     |
| α-helix                              | 1662                              | 36.70                 | 36.70            |                     |
| β-turn                               | 1681                              | 7.87                  | 7.87             |                     |
| <b>Amidated (+ 0)</b>                |                                   |                       |                  |                     |
| <b>Component</b>                     | <b>Position (cm<sup>-1</sup>)</b> | <b>Percentage (%)</b> | <b>total (%)</b> | <b>Amide I area</b> |
| β-sheet                              | 1622                              | 12.84                 | 50.15            | 0.34197             |
| β-sheet                              | 1635                              | 37.31                 |                  |                     |
| α-helix                              | 1663                              | 42.30                 | 42.30            |                     |
| β-turn                               | 1684                              | 7.55                  | 7.55             |                     |
| β-sheet                              | -                                 | 0                     | 0                |                     |
| <b>Acetylated and amidated (0 0)</b> |                                   |                       |                  |                     |
| <b>Component</b>                     | <b>Position (cm<sup>-1</sup>)</b> | <b>Percentage (%)</b> | <b>total (%)</b> | <b>Amide I area</b> |
| β-sheet                              | 1636                              | 58.89                 | 58.89            | 0.19632             |
| α-helix                              | 1662                              | 33.06                 | 33.06            |                     |
| β-turn                               | 1681                              | 8.05                  | 8.05             |                     |
| β-sheet                              | 1695                              | 0.05                  | 0.05             |                     |
| <b>Acetylated (0 -)</b>              |                                   |                       |                  |                     |
| <b>Component</b>                     | <b>Position (cm<sup>-1</sup>)</b> | <b>Percentage (%)</b> | <b>total (%)</b> | <b>Amide I area</b> |
| β-sheet                              | 1634                              | 59.30                 | 59.30            | 0.21897             |
| α-helix                              | 1662                              | 34.47                 | 34.47            |                     |
| β-turn                               | 1680                              | 6.23                  | 6.23             |                     |
| β-sheet                              | 1690                              | 0.1                   | 0.1              |                     |

## References

- (1) Triulzi, R. C.; Li, C.; Naistat, D.; Orbulescu, J.; Leblanc, R. M. A Two-Dimensional Approach to Study Amyloid  $\beta$ -Peptide Fragment (25–35). *J. Phys. Chem. C* **2007**, *111*, 4661–4666, DOI: 10.1021/jp0669005.
- (2) Desroches, M. J.; Chaudhary, N.; Omanovic, S. PM-IRRAS investigation of the interaction of serum albumin and fibrinogen with a biomedical-grade stainless steel 316LVM surface. *Biomacromolecules* **2007**, *8*, 2836–2844, DOI: 10.1021/bm070289d.
- (3) Sarroukh, R.; Goormaghtigh, E.; Ruyschaert, J.-M.; Raussens, V. ATR-FTIR: a "rejuvenated" tool to investigate amyloid proteins. *Biochim. Biophys. Acta* **2013**, *1828*, 2328–2338, DOI: 10.1016/j.bbamem.2013.04.012.
- (4) Yang, H.; Yang, S.; Kong, J.; Dong, A.; Yu, S. Obtaining information about protein secondary structures in aqueous solution using Fourier transform IR spectroscopy. *Nat. Protoc.* **2015**, *10*, 382–396, DOI: 10.1038/nprot.2015.024.
- (5) Ruggeri, F. S.; Longo, G.; Faggiano, S.; Lipiec, E.; Pastore, A.; Dietler, G. Infrared nanospectroscopy characterization of oligomeric and fibrillar aggregates during amyloid formation. *Nat. Commun.* **2015**, *6*, 7831, DOI: 10.1038/ncomms8831.
- (6) Cerf, E.; Sarroukh, R.; Tamamizu-Kato, S.; Breydo, L.; Derclaye, S.; Dufrêne, Y. F.; Narayanaswami, V.; Goormaghtigh, E.; Ruyschaert, J.-M.; Raussens, V. Antiparallel beta-sheet: a signature structure of the oligomeric amyloid beta-peptide. *Biochem. J.* **2009**, *421*, 415–423, DOI: 10.1042/BJ20090379.
- (7) Sarroukh, R.; Cerf, E.; Derclaye, S.; Dufrêne, Y. F.; Goormaghtigh, E.; Ruyschaert, J.-M.; Raussens, V. Transformation of amyloid  $\beta$ (1–40) oligomers into fibrils is characterized by a major change in secondary structure. *Cell. Mol. Life Sci.* **2011**, *68*, 1429–1438, DOI: 10.1007/s00018-010-0529-x.

- (8) Fortas, E.; Piccirilli, F.; Malabirade, A.; Militello, V.; Trépout, S.; Marco, S.; Taghbalout, A.; Arluison, V. New insight into the structure and function of Hfq C-terminus. *Biosci. Rep.* **2015**, *35*, DOI: 10.1042/BSR20140128.
- (9) Moran, S. D.; Zanni, M. T. How to Get Insight into Amyloid Structure and Formation from Infrared Spectroscopy. *J. Phys. Chem. Lett.* **2014**, *5*, 1984–1993, DOI: 10.1021/jz500794d.
- (10) Lomont, J. P.; Rich, K. L.; Maj, M.; Ho, J.-J.; Ostrander, J. S.; Zanni, M. T. Spectroscopic Signature for Stable  $\beta$ -Amyloid Fibrils versus  $\beta$ -Sheet-Rich Oligomers. *J. Phys. Chem. B* **2018**, *122*, 144–153, DOI: 10.1021/acs.jpcc.7b10765.
